# Supplementary material for: Long noncoding RNA Saf and splicing factor 45 increase soluble Fas and resistance to apoptosis
Source: PubMed Central journal article supplement (PMC4924680; doi:10.18632/oncotarget.7329), 2016-02-11
Supplement: oncotarget-07-13810-s001.pdf [file oncotarget-07-13810-s001.pdf]

## Long noncoding RNA Saf and splicing factor 45 increase soluble Fas and resistance to apoptosis

### Supplementary Material

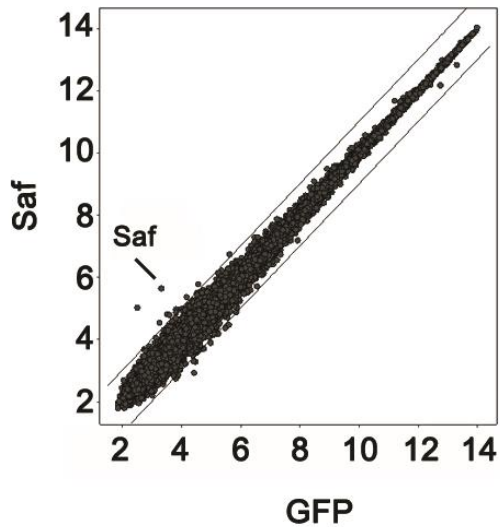

**Figure S1. (Related to Figure 2) Whole genome array of K652 cells with Saf overexpression.** Log<sub>2</sub> normalized intensity of probes from Affymetrix HG-U133\_Plus2 arrays performed on K562 cells. Linear regressions highlight  $\pm$  2-fold change in transcript levels where the dot corresponding to Saf is labeled.

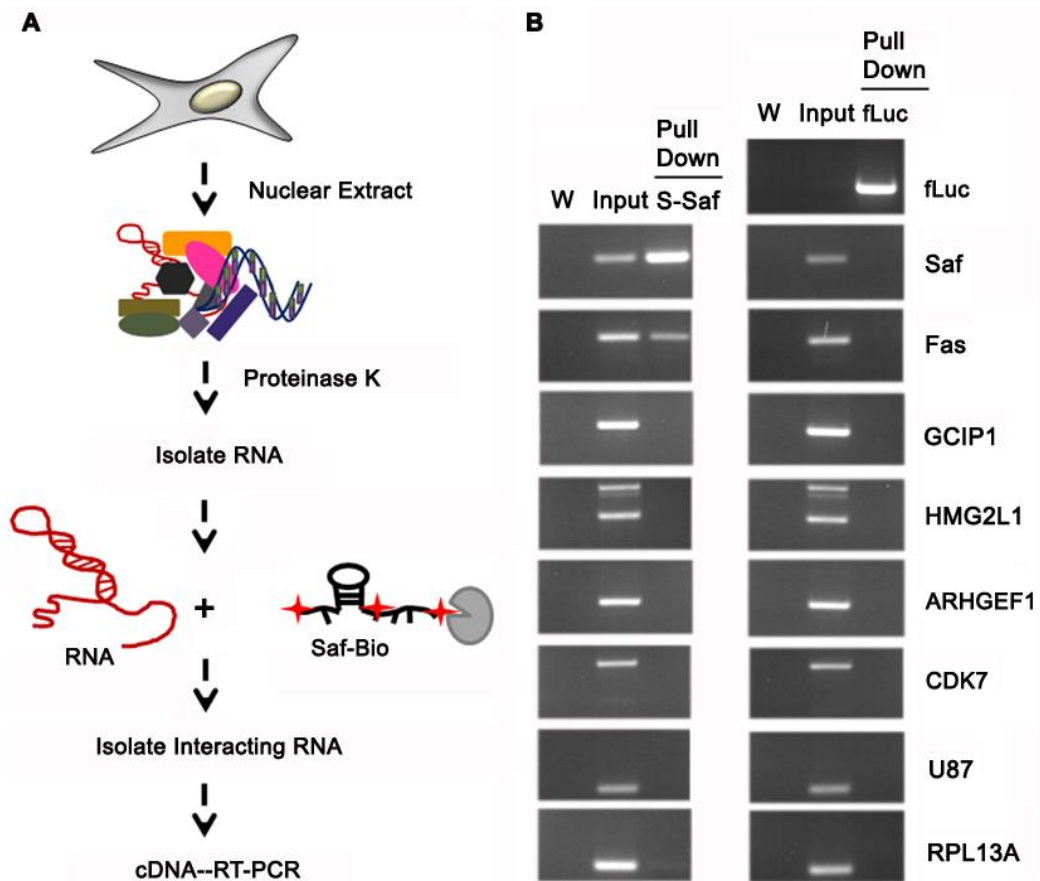

**Figure S2. (Related to Figure 3) Saf interacts with Fas mRNA. (A)** Schematic diagram of the RNA pull-down assay. **(B)** Agarose gel images of RT-PCR products generated for the indicated genes from RNA before (input) and after RNA pull-down using biotin-labeled versions of Saf (Left) or firefly luciferase (fLuc, Right). W, no template control.

**Table S1. Primers used in these studies.****A. Primers used for PCR cloning**

| <b>Name</b>       | <b>Forward</b>                              | <b>Reverse</b>              |
|-------------------|---------------------------------------------|-----------------------------|
| Saf lncRNA        | TTCCAAGTAATTAGCACTTTGC                      | ACGTAGGAAATAAGTCAGC         |
| Tth1111l-Saf-AgeI | GACTGCGTCTTCCAAGTAATTAGCACTTTGC             | ACCGGTACGTAGGAAATAAGTCAGC   |
| T3-Saf-NotI       | ATTAACCCTCACTAAAGTTCCAAGTAATTAGC<br>ACTTTGC | GCGGCCGCACGTAGGAAATAAGTCAGC |

**B. Primers used for RT-PCR and qRT-PCR**

| <b>Primer Name</b> | <b>Forward</b>          | <b>Reverse</b>            |
|--------------------|-------------------------|---------------------------|
| Saf                | ATCAGCGAACAGCCTGAGTT    | GAGCCATGTAGTGGGGAAGA      |
| 47S pre rRNA       | GCTGACACGCTGTCCTCTGG    | GAGAACGCCTGACACGCACG      |
| snoRNA U87         | ATGGGATCATGGAGCAGCTG    | TCACACCCATGACTGCCACT      |
| RPL13A             | CCTGGAGGAGAAGAGGAAAGAGA | TTGAGGACCTCTGTGTATTTGTCAA |
| Fas (endogenous)   | ATGTGAACATGGAATCATCAAGG | GGAGATTCATGAGAACCTTGG     |
| LUST               | AACAAGCCGCCTGAACTAAA    | CTGATTCCCCCAGTCTTCAA      |
| Zeb2NAT            | GTCAAGCCTTTGGCATCATT    | GGGCAGAGAACTTTGTTCCA      |

**C. Primers used for RNase A protection assay**

| <b>Primer Name</b> | <b>Sequence</b>         | <b>Pair</b>       | <b>Product Size (bp)</b> |
|--------------------|-------------------------|-------------------|--------------------------|
| Ex2 For            | TGCCCAAGTGACTGACATCA    | Ex2 For + In2 Rev | 660                      |
| In2 Rev            | CGTCTAGTTATTCAGCTGC     |                   |                          |
| In2 For            | CACTGTTTCTTATCAGGATTTG  | In2 For + Ex3 Rev | 553                      |
| Ex3 Rev            | TGGGCTTTGTCTGTGTACTION  |                   |                          |
| Ex3 For            | CTAGGGACTGCACAGTCAATG   | Ex3 For + In3 Rev | 490                      |
| In3 Rev            | CTGTGTCCTTGTATCTGCAG    |                   |                          |
| In3 For            | CATCAGAGTCTCTGAGTGAG    | In3 For + Ex4 Rev | 495                      |
| Ex4 Rev            | CAAGGGTCACAGTGTTTAC     |                   |                          |
| Ex4 For            | GGACCCAGAATACCAAGTGC    | Ex4 For + In4 Rev | 475                      |
| In4 Rev            | GACACATTCATGTCTTCACCTCC |                   |                          |
| In4 For            | CATGAACCTCTTGAGTCTCC    | In4 For + Ex5 Rev | 562                      |
| Ex5 Rev            | CTCTTTGCACTTGGTGTTGC    |                   |                          |
| Ex5 For            | ATGTGAACATGGAATCATCAAGG | Ex5 For + Ex6 Rev | 276                      |
| Ex6 Rev            | CAAACAATTAGTGGAATTGGC   |                   |                          |
| Ex6 For            | CCAGATCTAACTTGGGGTGG    | Ex6 For + In6 Rev | 419                      |
| In6 Rev            | GCAATGTGTTTCTGGGAATGCC  |                   |                          |
| In6 For            | GGACAGAGAGTGGTGCTTGCC   | In6 For + Ex7 Rev | 354                      |
| Ex7 Rev            | GGAGATTCATGAGAACCTTGG   |                   |                          |
| Ex7 For            | GGAAGTACAGAAAACATGC     | Ex7 For + In7 Rev | 516                      |
| In7 Rev            | CCTATGCACCCACAAACACAAGC |                   |                          |
| In7 For            | CCAGGGCTCAGTGGGAGTTAGG  | In7 For + Ex8 Rev | 454                      |
| Ex8 Rev            | CAGATAAATTTATTGCCACTG   |                   |                          |

**Table S2. (Related to Figure 4) Top twenty-one Saf interacting nuclear proteins identified by mass spectrometry.** Two biological replicates using mass-spectrometry analysis. \*confirmed by RNA-coimmunoprecipitation and western blot with specific antibodies.

| <b>Name</b> | <b>Description</b>                             | <b>Accession No.</b> | <b>General Characteristic</b> |
|-------------|------------------------------------------------|----------------------|-------------------------------|
| SSB         | Sjogren Syndrome Antigen B*                    | P05455               | RNA/DNA binding               |
| NRF         | NF-kappaB repressing factor                    | A3F769               | RNA/DNA binding               |
| SKIV2L2     | ATP-dependent helicase SKIV2L2                 | P42285               | Enzyme                        |
| SPF45       | Splicing Factor 45*                            | Q5W009               | pre-mRNA splicing             |
| COIL        | Coilin                                         | P38432               | RNA/DNA binding               |
| ZCCHC8      | Zinc finger CCHC domain-containing protein 8   | Q6NZY4               | pre-mRNA splicing             |
| PHF5A       | Splicing factor 3B-associated 14 kDa protein   | Q7RTV0               | pre-mRNA splicing             |
| SF3A        | Splicing factor 3A                             | Q15459               | pre-mRNA splicing             |
| DDX18       | ATP-dependent RNA helicase DDX18               | Q9NVP1               | RNA/DNA binding               |
| H3F3A       | Histone H3-3 A subunit                         | B4DEB1               | Structure                     |
| U2AF1       | Splicing factor U2AF 35 kDa subunit            | Q01081               | pre-mRNA splicing             |
| PRKRA       | Interferon-induced protein kinase              | O75569               | Enzyme                        |
| CPSF1       | Cleavage and polyadenylation specific factor 1 | Q10570               | RNA/DNA binding               |
| PDCD11      | Programmed Cell Death Protein 11 RRP5          | Q14690               | pre-mRNA splicing             |
| SNRPF       | Small nuclear ribonucleoprotein F              | P62306               | pre-mRNA splicing             |
| SNRPE       | Small nuclear ribonucleoprotein E              | P62304               | pre-mRNA splicing             |
| RCC2        | Regulator Of Chromosome Condensation protein 2 | Q9P258               | RNA/DNA binding               |
| MSH2        | DNA mismatch repair protein                    | E9PHA6               | RNA/DNA binding               |
| ZC3HAV1     | Zinc finger CCCH-type antiviral protein 1      | C9J6P4               | RNA/DNA binding               |
| GAR1        | H/ACA ribonucleoprotein complex subunit 1      | Q9NY12               | RNA/DNA binding               |
| XRN2        | 5'-3' exoribonuclease 2                        | B4DZC3               | RNA processing                |

**Table S3. (Related to Figure 7 and Experimental Procedures) RNAi Consortium shRNA clones used in this study.** Knockdown (KD) efficiency determined by qRT-PCR normalized to RNaseP and expressed relative to PGF (NTC) control. NTC, non-targeting control.

| <b>Clone Number</b> | <b>Target Gene</b> | <b>Target Sequence</b> | <b>KD Efficiency (%)</b> |
|---------------------|--------------------|------------------------|--------------------------|
| TRCN0000058238      | PGF (NTC)          | TGCAGCTCCTAAAGATCCGTT  | Control                  |
| TRCN0000001201      | SPF45              | GATGAAGCAGTACGGATATTT  | 0                        |
| TRCN0000001203      | SPF45              | AGATGAAGATTATGAGCGAGA  | 27                       |
| TRCN0000010600      | SPF45              | CCGGTGATCCTTAAATGAACT  | 63                       |
| TRCN0000231429      | SPF45              | ATACTTAAGTGTCCTACTAAA  | 69                       |
| TRCN0000231430      | SPF45              | GATGAAGCAGTACGGATATTT  | 33                       |
